# Supplementary material
Source: PubMed Central journal article supplement (PMC8102370)
Supplement: NIHMS1678991-supplement-2.pdf [file NIHMS1678991-supplement-2.pdf]

**Table S1 List of hits selected from the primary screen**

| <b>SBP Compound ID</b> | <b>Library (Vendor)</b> | <b>Molecule Name</b>                                          | <b>SLC1A5 PM Fraction *</b> |
|------------------------|-------------------------|---------------------------------------------------------------|-----------------------------|
| <i>SB193</i>           | EMD Biosciences         | (S)-H-1152 (hydrochloride),<br>Rho Kinase Inhibitor           | -119.6                      |
| <i>SB708</i>           | Cayman Chemicals        | (S)-Glycyl-H-1152 (hydrochloride),<br>Rho Kinase Inhibitor IV | -114.3                      |
| SB195                  | EMD Biosciences         | Rho Kinase Inhibitor V                                        | -109.6                      |
| <i>SB321</i>           | SelleckChem             | Y-27632 2HCl, ROCK1 inhibitor                                 | -76.7                       |
| <i>SB686</i>           | EMD Biosciences         | JAK3 Inhibitor VI                                             | -74.2                       |
| SB661                  | AnalytiCon Discovery    |                                                               | -71.7                       |
| <i>SB261</i>           | SelleckChem             | Ruxolitinib, JAK inhibitor                                    | -69.9                       |
| SB435                  | SelleckChem             | NU7441(KU-57788)                                              | -67.6                       |
| SBI442                 | SelleckChem             | MLN8054, Aurora Kinase inhibitor                              | -63.1                       |
| SB727                  | EMD Biosciences         | AlsterPauollone,<br>CDK1/cyclin B Inhibitor                   | -62.0                       |
| SB615                  | AnalytiCon Discovery    |                                                               | -61.2                       |
| SB678                  | AnalytiCon Discovery    |                                                               | -53.6                       |
| SB403                  | Prestwick               | Hexachlorophene                                               | -53.4                       |
| SB296                  | AnalytiCon Discovery    |                                                               | -52.7                       |
| SB892                  | Prestwick Chemical      | Monensin sodium salt                                          | -52.5                       |
| <i>SB156</i>           | EMD Biosciences         | IMD 0354, IKK-2 Inhibitor V                                   | -52.2                       |
| <i>SB448</i>           | SelleckChem             | Baricitinib (LY3009104,<br>INCB028050),<br>JAK inhibitor      | -51.3                       |
| SB440                  | SelleckChem             | Brivanib (BMS-540215)                                         | -48.4                       |
| SB443                  | SelleckChem             | Brivanib alaninate (BMS-582664)                               | -48.3                       |
| SB655                  | AnalytiCon Discovery    |                                                               | -48.0                       |
| SB208                  | EMD Biosciences         | Wee1 Inhibitor                                                | -46.4                       |
| SB822                  | AnalytiCon Discovery    |                                                               | -45.3                       |
| SB418                  | SelleckChem             | TAK-733, MEK inhibitor                                        | -45.3                       |
| <i>SB762</i>           | SelleckChem             | TPCA-1, IKK-2 Inhibitor IV                                    | -44.7                       |
| SB628                  | AnalytiCon Discovery    |                                                               | -44.4                       |
| SB135                  | EMD Biosciences         | Bisindolylmaleimide III,<br>Hydrochloride                     | -43.8                       |
| <i>SB688</i>           | SelleckChem             | SU11274, Met Kinase Inhibitor                                 | -43.5                       |
| SB304                  | AnalytiCon Discovery    |                                                               | -41.0                       |
| SB392                  | SelleckChem             | Neratinib (HKI-272)                                           | -41.0                       |
| SB887                  | AnalytiCon Discovery    |                                                               | -40.7                       |
| SB040                  | AnalytiCon Discovery    |                                                               | -40.6                       |
| SB617                  | AnalytiCon Discovery    |                                                               | -40.6                       |

\* See Fig 2b for definition

**Table S2. Chemical structures of hits selected for validation**

| SBP Compound ID | Compound name     | Structure                                                                           | Reference |
|-----------------|-------------------|-------------------------------------------------------------------------------------|-----------|
| SB193           | (S)-H-1152        | 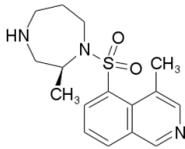   | (1)       |
| SB708           | (S)-Glycyl-H-1152 |    | (2)       |
| SB321           | Y-27632           |    | (3)       |
| SB686           | JAK3 Inhibitor VI |   | (4)       |
| SB261           | Ruxolitinib       |  | (5)       |
| SB448           | Baricitinib       |  | (6)       |
| SB762           | TPCA-1            |  | (7,8)     |
| SB688           | SU11274           |  | (9)       |

## References Cited:

1. Sasaki Y, Suzuki M, Hidaka H. The novel and specific Rho-kinase inhibitor (S)-(+)-2-methyl-1-[(4-methyl-5-isoquinoline)sulfonyl]-homopiperazine as a probing molecule for Rho-kinase-involved pathway. *Pharmacol Ther* **2002**;93(2-3):225-32 doi 10.1016/s0163-7258(02)00191-2.
2. Tamura M, Nakao H, Yoshizaki H, Shiratsuchi M, Shigyo H, Yamada H, *et al.* Development of specific Rho-kinase inhibitors and their clinical application. *Biochim Biophys Acta* **2005**;1754(1-2):245-52 doi 10.1016/j.bbapap.2005.06.015.
3. Uehata M, Ishizaki T, Satoh H, Ono T, Kawahara T, Morishita T, *et al.* Calcium sensitization of smooth muscle mediated by a Rho-associated protein kinase in hypertension. *Nature* **1997**;389(6654):990-4 doi 10.1038/40187.
4. Adams C, Aldous DJ, Amendola S, Bamborough P, Bright C, Crowe S, *et al.* Mapping the kinase domain of Janus Kinase 3. *Bioorg Med Chem Lett* **2003**;13(18):3105-10 doi 10.1016/s0960-894x(03)00657-7.
5. Verstovsek S. Therapeutic potential of JAK2 inhibitors. *Hematology Am Soc Hematol Educ Program* **2009**:636-42 doi 10.1182/asheducation-2009.1.636.
6. Fridman JS, Scherle PA, Collins R, Burn TC, Li Y, Li J, *et al.* Selective inhibition of JAK1 and JAK2 is efficacious in rodent models of arthritis: preclinical characterization of INCB028050. *J Immunol* **2010**;184(9):5298-307 doi 10.4049/jimmunol.0902819.
7. Podolin PL, Callahan JF, Bolognese BJ, Li YH, Carlson K, Davis TG, *et al.* Attenuation of murine collagen-induced arthritis by a novel, potent, selective small molecule inhibitor of I $\kappa$ B Kinase 2, TPCA-1 (2-[(aminocarbonyl)amino]-5-(4-fluorophenyl)-3-thiophenecarboxamide), occurs via reduction of proinflammatory cytokines and antigen-induced T cell Proliferation. *J Pharmacol Exp Ther* **2005**;312(1):373-81 doi 10.1124/jpet.104.074484.
8. Stevenson CS, Capper EA, Roshak AK, Marquez B, Grace K, Gerwick WH, *et al.* Scytonemin--a marine natural product inhibitor of kinases key in hyperproliferative inflammatory diseases. *Inflamm Res* **2002**;51(2):112-4 doi 10.1007/BF02684014.
9. Wang X, Le P, Liang C, Chan J, Kiewlich D, Miller T, *et al.* Potent and selective inhibitors of the Met [hepatocyte growth factor/scatter factor (HGF/SF) receptor] tyrosine kinase block HGF/SF-induced tumor cell growth and invasion. *Mol Cancer Ther* **2003**;2(11):1085-92.
